# Supplementary material for: Leveraging Machine Learning techniques and SEVIRI data to detect volcanic clouds composed of ash, ice, and SO 2
Source: Copernicus journal article supplement (doi:10.5194/egusphere-2026-727), 2026-02-23
Supplement: Supplementary file 1 [file List of SEVIRI images.pdf › Supplement/List of SEVIRI images.pdf]

**Table S1. List of SEVIRI images used to create the dataset.**

| <b>Event ID</b> | <b>Number of SEVIRI images</b> | <b>Start date and time (UTC)</b> | <b>End date and time (UTC)</b> |
|-----------------|--------------------------------|----------------------------------|--------------------------------|
| <b>1</b>        | 13                             | 13 Dec 2020, 22:00               | 14 Dec 2020, 01:00             |
| <b>2</b>        | 30                             | 21 Dec 2020, 09:15               | 21 Dec 2020, 16:30             |
| <b>3</b>        | 16                             | 22 Dec 2020, 03:30               | 22 Dec 2020, 07:15             |
| <b>4</b>        | 6                              | 18 Jan 2021, 19:15               | 18 Jan 2021, 20:30             |
| <b>5</b>        | 8                              | 16 Feb 2021, 16:15               | 16 Feb 2021, 18:00             |
| <b>6</b>        | 31                             | 19 Feb 2021, 08:45               | 19 Feb 2021, 16:15             |
| <b>7</b>        | 29                             | 20 Feb 2021, 22:00               | 21 Feb 2021, 05:00             |
| <b>8</b>        | 25                             | 24 Feb 2021, 20:00               | 25 Feb 2021, 02:00             |
| <b>9</b>        | 31                             | 28 Feb 2021, 08:00               | 28 Feb 2021, 15:30             |
| <b>10</b>       | 23                             | 2 Mar 2021, 12:30                | 2 Mar 2021, 18:00              |
| <b>11</b>       | 25                             | 7 Mar 2021, 06:00                | 7 Mar 2021, 12:00              |
| <b>12</b>       | 31                             | 10 Mar 2021, 00:00               | 10 Mar 2021, 07:30             |
| <b>13</b>       | 41                             | 12 Mar 2021, 07:00               | 12 Mar 2021, 17:00             |
| <b>14</b>       | 21                             | 19 Mar 2021, 08:15               | 19 Mar 2021, 13:15             |
| <b>15</b>       | 39                             | 23 Mar 2021, 23:30               | 24 Mar 2021, 09:00             |
| <b>16</b>       | 53                             | 31 Mar 2021, 21:00               | 1 Apr 2021, 10:00              |
| <b>17</b>       | 25                             | 19 May 2021, 00:00               | 19 May 2021, 06:00             |
| <b>18</b>       | 16                             | 21 May 2021, 00:45               | 21 May 2021, 04:30             |
| <b>19</b>       | 26                             | 22 May 2021, 20:30               | 23 May 2021, 02:45             |
| <b>20</b>       | 17                             | 24 May 2021, 20:00               | 25 May 2021, 00:00             |
| <b>21</b>       | 11                             | 25 May 2021, 18:00               | 25 May 2021, 20:30             |
| <b>22</b>       | 17                             | 26 May 2021, 10:00               | 26 May 2021, 14:00             |
| <b>23</b>       | 21                             | 30 May 2021, 04:30               | 30 May 2021, 09:30             |
| <b>24</b>       | 9                              | 4 Jun 2021, 16:45                | 4 Jun 2021, 18:45              |
| <b>25</b>       | 23                             | 12 Jun 2021, 19:30               | 13 Jun 2021, 01:00             |
| <b>26</b>       | 23                             | 16 Jun 2021, 12:00               | 16 Jun 2021, 17:30             |
| <b>27</b>       | 25                             | 17 Jun 2021, 23:00               | 18 Jun 2021, 05:00             |
| <b>28</b>       | 17                             | 19 Jun 2021, 19:00               | 19 Jun 2021, 23:00             |
| <b>29</b>       | 33                             | 22 Jun 2021, 03:00               | 22 Jun 2021, 11:00             |
| <b>30</b>       | 19                             | 23 Jun 2021, 02:30               | 23 Jun 2021, 07:00             |
| <b>31</b>       | 17                             | 23 Jun 2021, 18:30               | 23 Jun 2021, 22:45             |
| <b>32</b>       | 25                             | 25 Jun 2021, 00:00               | 25 Jun 2021, 06:00             |
| <b>33</b>       | 22                             | 25 Jun 2021, 18:30               | 25 Jun 2021, 23:45             |
| <b>34</b>       | 14                             | 26 Jun 2021, 16:15               | 26 Jun 2021, 19:30             |
| <b>35</b>       | 23                             | 27 Jun 2021, 09:15               | 27 Jun 2021, 14:45             |
| <b>36</b>       | 30                             | 28 Jun 2021, 14:30               | 28 Jun 2021, 21:45             |
| <b>37</b>       | 37                             | 1 Jul 2021, 23:00                | 2 Jul 2021, 08:00              |
| <b>38</b>       | 18                             | 4 Jul 2021, 15:00                | 4 Jul 2021, 19:15              |
| <b>39</b>       | 38                             | 6 Jul 2021, 22:00                | 7 Jul 2021, 11:00              |
| <b>40</b>       | 37                             | 8 Jul 2021, 20:30                | 9 Jul 2021, 10:00              |
| <b>41</b>       | 27                             | 14 Jul 2021, 10:30               | 14 Jul 2021, 17:00             |
| <b>42</b>       | 37                             | 20 Jul 2021, 05:30               | 20 Jul 2021, 14:30             |
| <b>43</b>       | 35                             | 31 Jul 2021, 18:30               | 1 Aug 2021, 03:00              |
| <b>44</b>       | 42                             | 9 Aug 2021, 01:45                | 9 Aug 2021, 12:00              |
| <b>45</b>       | 38                             | 29 Aug 2021, 15:00               | 30 Aug 2021, 01:00             |
| <b>46</b>       | 27                             | 21 Sep 2021, 07:30               | 21 Sep 2021, 14:00             |
| <b>47</b>       | 30                             | 23 Oct 2021, 08:45               | 23 Oct 2021, 16:00             |
| <b>48</b>       | 34                             | 10 Feb 2022, 19:30               | 11 Feb 2022, 03:45             |
| <b>49</b>       | 24                             | 21 Feb 2022, 11:15               | 21 Feb 2022, 17:00             |
